# Supplementary material for: Novel approaches to model-free analysis of lanthanide-induced shifts, targeted to the investigation of contact term behavior
Source: Royal Society of Chemistry journal article supplement (doi:10.1039/c1dt10455a), 2011-01-01
Supplement: c1dt10455a.pdf [file c1dt10455a.pdf]

## Electronic supplementary information (ESI)

### DERIVATION OF NOVEL EQUATIONS FOR MODEL-FREE ANALYSIS OF LANTHANIDE INDUCED SHIFTS

$$\text{Given: } \Delta\delta_k = \langle S_Z \rangle_{Ln} \cdot F_k + D_{Ln} \cdot A_2^0 \cdot G_k$$

Division of both sides by  $D_{Ln}$  produces

$$\frac{\Delta\delta_k}{D_{Ln}} = \frac{\langle S_Z \rangle_{Ln}}{D_{Ln}} \cdot F_k + A_2^0 \cdot G_k$$

Expression of  $A_2^0$  for atoms  $k$  and  $l$  from eqn. (esi2) produces

$$\begin{cases} A_2^0 = \frac{1}{G_k} \cdot \left( \frac{\Delta\delta_k}{D_{Ln}} - \frac{\langle S_Z \rangle_{Ln}}{D_{Ln}} \cdot F_k \right) \\ A_2^0 = \frac{1}{G_l} \cdot \left( \frac{\Delta\delta_l}{D_{Ln}} - \frac{\langle S_Z \rangle_{Ln}}{D_{Ln}} \cdot F_l \right) \end{cases}$$

Setting right sides of expressions equal produces

$$\frac{1}{G_k} \cdot \left( \frac{\Delta\delta_k}{D_{Ln}} - \frac{\langle S_Z \rangle_{Ln}}{D_{Ln}} \cdot F_k \right) = \frac{1}{G_l} \cdot \left( \frac{\Delta\delta_l}{D_{Ln}} - \frac{\langle S_Z \rangle_{Ln}}{D_{Ln}} \cdot F_l \right)$$

$$\frac{\Delta\delta_k}{D_{Ln}} = \frac{\langle S_Z \rangle_{Ln}}{D_{Ln}} \cdot (F_k - F_l \cdot R_{kl}) + \frac{\Delta\delta_l}{D_{Ln}} \cdot R_{kl}, \quad R_{kl} = \frac{G_k}{G_l}$$

eqn. (8) from original manuscript

Expression of  $\frac{\langle S_Z \rangle_{Ln}}{D_{Ln}}$  from  $\frac{\Delta\delta_l}{D_{Ln}} = \frac{\langle S_Z \rangle_{Ln}}{D_{Ln}} \cdot F_l + A_2^0 \cdot G_l$  produces

$$\frac{\langle S_Z \rangle_{Ln}}{D_{Ln}} = \frac{1}{F_l} \left( \frac{\Delta\delta_l}{D_{Ln}} - A_2^0 \cdot G_l \right)$$

Substitution of  $\frac{\langle S_Z \rangle_{Ln}}{D_{Ln}}$  in  $\frac{\Delta\delta_k}{D_{Ln}} = \frac{\langle S_Z \rangle_{Ln}}{D_{Ln}} \cdot F_k + A_2^0 \cdot G_k$  produces

$$\frac{\Delta\delta_k}{D_{Ln}} = \frac{F_k}{F_l} \left( \frac{\Delta\delta_l}{D_{Ln}} - A_2^0 \cdot G_l \right) + A_2^0 \cdot G_k$$

$$\frac{\Delta\delta_k}{D_{Ln}} = \frac{\Delta\delta_l}{D_{Ln}} \cdot \frac{F_k}{F_l} + A_2^0 \cdot \left( G_k - G_l \cdot \frac{F_k}{F_l} \right)$$

$$\frac{\Delta\delta_k}{D_{Ln}} = \frac{\Delta\delta_l}{D_{Ln}} \cdot \Phi_{kl} + A_2^0 \cdot \Gamma_{kl}, \quad \Phi_{kl} = \frac{F_k}{F_l}, \quad \Gamma_{kl} = \left( G_k - G_l \cdot \frac{F_k}{F_l} \right)$$

eqns. (9)-(11) from original manuscript

Expression of  $A_2^0$  for pairs of atoms  $kl$  and  $lm$  from eqn.(9) produces

$$\begin{cases} A_2^0 = \frac{1}{\Gamma_{kl}} \left( \frac{\Delta\delta_l}{D_{Ln}} \cdot \Phi_{kl} - \frac{\Delta\delta_k}{D_{Ln}} \right) \\ A_2^0 = \frac{1}{\Gamma_{lm}} \left( \frac{\Delta\delta_m}{D_{Ln}} \cdot \Phi_{kl} - \frac{\Delta\delta_l}{D_{Ln}} \right) \end{cases}$$

Setting right sides of expressions equal and subsequent rearrangements produce

$$\frac{\Delta\delta_l}{D_{Ln}} \cdot \Phi_{kl} - \frac{\Delta\delta_k}{D_{Ln}} = \frac{\Gamma_{kl}}{\Gamma_{lm}} \left( \frac{\Delta\delta_m}{D_{Ln}} \cdot \Phi_{kl} - \frac{\Delta\delta_l}{D_{Ln}} \right)$$

$$\frac{\Delta\delta_k}{D_{Ln}} = \frac{\Delta\delta_l}{D_{Ln}} \cdot \Phi_{kl} + \frac{\Delta\delta_l}{D_{Ln}} \cdot \frac{\Gamma_{kl}}{\Gamma_{lm}} - \frac{\Delta\delta_m}{D_{Ln}} \cdot \frac{\Gamma_{kl}}{\Gamma_{lm}} \cdot \Phi_{kl}$$

$$\frac{\Delta\delta_k}{D_{Ln}} = \frac{\Delta\delta_l}{D_{Ln}} \left( \Phi_{kl} + \frac{\Gamma_{kl}}{\Gamma_{lm}} \right) - \frac{\Delta\delta_m}{D_{Ln}} \left( \frac{\Gamma_{kl}}{\Gamma_{lm}} \cdot \Phi_{kl} \right)$$

$$\frac{\Delta\delta_k}{D_{Ln}} = \frac{\Delta\delta_l}{D_{Ln}} \cdot S_{kln} - \frac{\Delta\delta_m}{D_{Ln}} \cdot M_{kln}, \quad S_{kln} = \left( \Phi_{kl} + \frac{\Gamma_{kl}}{\Gamma_{lm}} \right), \quad M_{kln} = \left( \frac{\Gamma_{kl}}{\Gamma_{lm}} \cdot \Phi_{kl} \right)$$

eqns. (12)-(14) from original manuscript

**Table S1** Values of  $S_{klm}$  and  $M_{klm}$  for (Nd-Eu) and (Tb-Yb) subfamilies of (Pc)M[(15C5)<sub>4</sub>Pc]M(Pc) in CDCl<sub>3</sub> at 298K

| $klm$ | (Nd-Eu)   |           | (Tb-Yb)   |           |
|-------|-----------|-----------|-----------|-----------|
|       | $S_{klm}$ | $M_{klm}$ | $S_{klm}$ | $M_{klm}$ |
| 123   | 3.875     | -1.368    | 2.336     | 0.665     |
| 124   | -5.364    | 6.568     | 2.356     | 0.328     |
| 125   | 1.907     | 1.588     | 2.308     | 0.661     |
| 126   | 1.849     | 2.565     | 1.364     | 3.165     |
| 127   | 2.244     | 2.054     | 1.349     | 3.542     |
| 134   | -0.827    | 2.771     | 0.914     | 1.794     |
| 135   | 1.43      | 3.04      | 0.871     | 3.263     |
| 136   | 1.261     | 4.892     | 0.697     | 5.272     |
| 137   | 2.049     | 4.622     | 0.661     | 5.895     |
| 145   | 1.76      | 1.107     | 0.503     | 3.17      |
| 146   | 1.755     | 1.714     | 0.417     | 5.12      |
| 147   | 1.947     | 1.418     | 0.421     | 5.655     |
| 156   | -4.334    | 13.178    | -6.281    | 15.942    |
| 157   | 8.626     | -8.046    | -2.165    | 10.635    |
| 167   | 9.703     | -3.803    | 1.97      | 4.762     |
| 234   | 0.155     | 0.707     | 0.105     | 0.769     |
| 235   | 0.731     | 0.777     | 0.108     | 1.378     |
| 236   | 0.679     | 1.261     | 0.035     | 2.226     |
| 237   | 0.898     | 1.167     | 0.026     | 2.48      |
| 245   | 0.897     | -0.208    | 0.09      | 1.317     |
| 246   | 0.899     | -0.323    | 0.059     | 2.114     |
| 247   | 0.862     | -0.266    | 0.067     | 2.315     |
| 256   | -4.869    | 9.622     | 1.006     | 0.728     |
| 257   | 3.972     | -4.735    | 1.884     | -0.691    |
| 267   | 4.54      | -2.867    | 10.596    | -9.211    |
| 345   | 1.228     | -1.348    | 0.495     | 0.043     |
| 346   | 1.324     | -2.335    | 0.478     | 0.113     |
| 347   | 0.952     | -1.571    | 0.468     | 0.156     |
| 356   | -7.107    | 12.214    | -13.399   | 22.062    |
| 357   | 4.259     | -6.273    | -7.796    | 14.877    |
| 367   | 4.81      | -4.201    | -12.953   | 15.928    |
| 456   | -4.638    | 9.867     | -16.278   | 27.823    |
| 457   | 4.556     | -5.09     | -6.883    | 14.791    |
| 467   | 5.184     | -2.919    | 7.333     | -5.062    |
| 567   | 1.167     | 0.442     | 3.147     | -1.779    |
